# Supplementary material for: Mosquito Transcriptome Profiles and Filarial Worm Susceptibility in Armigeres subalbatus
Source: PLoS Negl Trop Dis. 2010 Apr 20;4(4):e666. doi: 10.1371/journal.pntd.0000666 (PMC2857672; doi:10.1371/journal.pntd.0000666)
Supplement: Table S2 — Analysis of all Armigeres subalbatus genes transcribed by Brugia pahangi-infected mosquitoes. A tabular representation of all transcripts showing a detectable increase or decrease in abundance at all time points. The table lists the ASAPID number, associated product, GO designation, and relative transcript abundance. All time points are represented. (0.08 MB XLS) [file pntd.0000666.s002.xls]

## Sheet: Sheet1
Table S2. Analysis of all genes transcribed by B. pahangi-infected mosquitoes
ASAPID	Product	GO biological process	GO molecular function	GO cellular component	Relative Transcript Abundance (Fold Change; p<0.05)
1 Hour
ACN-0181041	putative: glycine-rich secreted salivary peptide				7.364
ACN-0182765	putative: conserved unknown				2.387
ACN-0185532	questionable: keratin				2.208
ACN-0187011	questionable: keratin 10				2.186
ACN-0185889	unknown				2.166
ACN-0180814	conserved unknown				2.061
ACN-0183034	conserved unknown				-2.01
ACN-0184910	thymidylate synthase	pyrimidine base metabolic process;dTMP biosynthetic process;DNA metabolic process;deoxyribonucleotide biosynthetic process	thymidylate synthase activity;oxidoreductase activity		-2.6
ACN-0186827	unknown				-3.05
ACN-0184254	unknown				-3.94
ACN-0186542	questionable: stem-loop binding protein				-4.02
ACN-0187935	putative: conserved unknown				-4.743
ACN-0181159	unknown				-4.78
ACN-0182237	unknown				-6.37
ACN-0181552	questionable: conserved unknown				-6.41
ACN-0187203	unknown				-6.99
ACN-0187012	putative: volume-sensitive anion channel	chloride transport;regulation of cell volume	volume-sensitive anion channel activity	cellular_component	-8
ACN-0187461	thioredoxin	protein folding;sulfur metabolic process;cell redox homeostasis	electron carrier activity;protein disulfide oxidoreductase activity;thiol-disulfide exchange intermediate activity	cytosol;membrane	-8.7
ACN-0185544	calcium-independent phospholipase	immune response	tumor necrosis factor receptor binding;calcium-independent phospholipase A2 activity	lysosome;beta-galactosidase complex	-9.17
ACN-0180368	putative: beta-galactosidase	carbohydrate metabolic process;salivary gland cell autophagic cell death;autophagic cell death	beta-galactosidase activity		-10.06
ACN-0184261	questionable: kinesin associated protein 3				-10.66
ACN-0187844	conserved unknown				-14.1
ACN-0183657	unknown				-16.75
ACN-0188201	putative: conserved unknown				-18.12
ACN-0185665	unknown				-18.59
ACN-0187446	unknown				-19.8
ACN-0181783	putative: conserved unknown				-20.75
ACN-0184428	conserved unknown				-22.08
ACN-0181848	unknown				-32.68
ACN-0180664	questionable: transcription regulator				-34.01
ACN-0182772	unknown				-50.25
3 Hour
ACN-0180457	questionable: conserved unknown				14.46
ACN-0187707	dimethylaniline monooxygenase (N-oxide forming)	electron transport;amino acid metabolic process	monooxygenase activity;dimethylaniline monooxygenase (N-oxide-forming) activity	mitochondrion;microsome;cytosol	10.65
ACN-0185532	questionable: keratin				9.388
ACN-0187239	putative: conserved unknown				8.078
ACN-0180573	unknown				7.822
ACN-0185889	unknown				7.688
ACN-0186260	conserved unknown				7.513
ACN-0186385	putative: conserved unknown				7.07
ACN-0181082	putative: conserved unknown				6.93
ACN-0181025	questionable: conserved unknown				5.928
ACN-0187011	questionable: keratin 10				5.291
ACN-0184331	unknown				5.196
ACN-0187656	unknown				5.078
ACN-0182511	unknown				4.554
ACN-0184394	putative: serine protease	proteolysis	trypsin activity;monophenol monooxygenase activator activity		4.546
ACN-0182295	questionable: conserved unknown				4.414
ACN-0181325	serine protease	proteolysis	serine-type endopeptidase activity		4.392
ACN-0186855	putative: conserved unknown				4.345
ACN-0183253	putative: serine protease -!- questionable: Bombyx mori prophenoloxidase activating factor 3	proteolysis	serine-type endopeptidase activity		4.319
ACN-0180480	serine protease	proteolysis	serine-type endopeptidase activity		3.622
ACN-0186097	putative: chitinase	cuticle chitin catabolic process;signal transduction;cell-cell signaling	chitinase activity;hydrolase activity, hydrolyzing N-glycosyl compounds	extracellular region	3.437
ACN-0180264	questionable: acetyl-CoA carboxylase				3.37
ACN-0186520	unknown				3.241
ACN-0186842	putative: potassium:amino acid symporter	amino acid metabolic process;cation transport;neurotransmitter transport;extracellular transport;amino acid transport	neurotransmitter:sodium symporter activity;cation transporter activity;potassium:amino acid symporter activity	integral to plasma membrane	3.026
ACN-0186435	dimethylaniline monooxygenase (N-oxide-forming)	electron transport;amino acid metabolic process	monooxygenase activity;dimethylaniline monooxygenase (N-oxide-forming) activity;disulfide oxidoreductase activity	mitochondrion;microsome;cytosol	2.802
ACN-0182842	putative: conserved unknown				2.791
ACN-0185106	unknown				2.687
ACN-0184442	putative: serine carboxyprotease	proteolysis;defense response;melanization defense response;positive regulation of melanization defense response	serine carboxypeptidase activity;trypsin activity;serine-type peptidase activity;monophenol monooxygenase activator activity		2.652
ACN-0185477	transferrin precursor -!- putative: transferrin	iron ion transport;iron ion homeostasis;defense response	iron ion transporter activity;carrier activity;ferric iron binding	extracellular region	2.583
ACN-0180816	cytosolic large ribosomal subunit L26	translation	nucleic acid binding;structural constituent of ribosome	cytosolic large ribosomal subunit (sensu Eukaryota)	2.496
ACN-0187345	questionable: conserved unknown				2.48
ACN-0180550	putative:serine protease				2.47
ACN-0185796	unknown				2.466
ACN-0186845	questionable: conserved unknown				2.448
ACN-0182518	questionable: chitin binding				2.373
ACN-0187083	conserved unknown				2.362
ACN-0187576	questionable: pyrophosphatase				2.304
ACN-0187670	unknown				2.263
ACN-0186633	unknown				2.204
ACN-0183021	unknown				2.194
ACN-0183516	unknown				2.188
ACN-0182555	putative: protease inhibitor		endopeptidase inhibitor activity		2.185
ACN-0181732	putative: chromatin assembly factor 1 subunit	negative regulation of transcription from RNA polymerase II promoter;cytokinesis;DNA repair;nucleosome assembly;DNA replication-dependent nucleosome assembly;chromatin silencing;transcription;chorion gene amplification;histone methylation;histone acetylation;nucleosome spacing;nucleosome mobilization	chromatin binding;histone acetyltransferase binding;histone binding;histone deacetylase binding;histone lysine N-methyltransferase activity (H3-K9 specific);histone lysine N-methyltransferase activity (H3-K27 specific)	nucleus;transcription factor complex;chromatin assembly complex;polytene chromosome;chromatin remodeling complex;NURF complex;ACF complex;Myb complex;ESC/E(Z) complex	2.163
ACN-0180383	putative: conserved unknown				2.151
ACN-0185423	unknown				2.149
ACN-0186112	protein kinase C inhibitor				2.144
ACN-0184789	questionable: nucleic acid binding protein				2.102
ACN-0181224	putative: mucin-like peritrophin				2.063
ACN-0187105	questionable: DNA binding protein				2.058
ACN-0182765	putative: conserved unknown				2.004
ACN-0184581	3-hydroxyisobutyrate dehydrogenase	pentose-phosphate shunt;amino acid metabolic process;valine metabolic process	phosphogluconate dehydrogenase (decarboxylating) activity;3-hydroxyisobutyrate dehydrogenase activity;NAD binding	mitochondrion	-2.09
ACN-0188001	innexin-1 -!- gap-junction forming channel	signal transduction;nervous system development;phototransduction;visual behavior	gap-junction forming channel activity	gap junction;integral to membrane	-2.15
ACN-0187467	unknown				-2.18
ACN-0180919	questionable: DNA ligase (ATP)				-2.28
ACN-0181256	unknown				-2.31
ACN-0187373	unknown				-2.35
ACN-0181436	carrier	coenzyme metabolic process;transport;prosthetic group metabolic process	carrier activity;retinal binding	intracellular	-2.4
ACN-0181835	questionable: conserved unknown -!- conserved unknown				-2.4
ACN-0180196	putative: vitellogenin-B				-2.51
ACN-0182097	questionable: transcription regulator				-2.7
ACN-0184190	questionable: insulin-like growth factor				-2.72
ACN-0185620	unknown				-3.15
ACN-0186186	vitellogenin				-3.21
ACN-0183777	unknown				-3.7
ACN-0184664	cytosolic large ribosomal subunit L27	translation	nucleic acid binding;structural constituent of ribosome	cytosolic large ribosomal subunit (sensu Eukaryota)	-4.31
ACN-0186094	protein binding	protein modification;protein import into nucleus;anti-apoptosis;chromosome segregation;mitosis;anterior/posterior pattern formation	protein binding		-7.46
ACN-0184877	putative: conserved unknown				-11
ACN-0180986	putative: conserved unknown				-11.88
ACN-0184811	putative: N-glycosyl hydrolase	carbohydrate metabolic process	glucosidase activity;hydrolase activity, hydrolyzing N-glycosyl compounds		-14.71
ACN-0187663	lamin	cytoskeleton organization and biogenesis;mitotic nuclear envelope reassembly	structural constituent of cytoskeleton	lamin filament	-14.75
ACN-0183609	conserved unknown				-17.04
ACN-0187095	unknown				-19.61
ACN-0182568	putative: carrier	transport	carrier activity;binding	mitochondrial envelope;mitochondrial inner membrane	-20
ACN-0187472	unknown				-20.83
ACN-0184868	questionable: conserved unknown				-33.78
6 Hour
ACN-0180457	questionable: conserved unknown				25.5
ACN-0185532	questionable: keratin				17.01
ACN-0186385	putative: conserved unknown				13.52
ACN-0181041	putative: glycine-rich secreted salivary peptide				13.2
ACN-0180573	unknown				12.75
ACN-0185889	unknown				12.69
ACN-0182548	questionable: conserved unknown				12.12
ACN-0182511	unknown				10.72
ACN-0182427	unknown				8.991
ACN-0181082	putative: conserved unknown				7.352
ACN-0186855	putative: conserved unknown				6.188
ACN-0181325	serine protease	proteolysis	serine-type endopeptidase activity		5.913
ACN-0182295	questionable: conserved unknown				5.443
ACN-0187011	questionable: keratin 10				5.141
ACN-0185369	questionable: conserved unknown				4.796
ACN-0187239	putative: conserved unknown				4.765
ACN-0183253	putative: serine protease -!- questionable: Bombyx mori prophenoloxidase activating factor 3	proteolysis	serine-type endopeptidase activity		4.438
ACN-0184331	unknown				4.361
ACN-0183955	unknown				3.976
ACN-0183999	unknown				3.881
ACN-0184394	putative: serine protease	proteolysis	trypsin activity;monophenol monooxygenase activator activity		3.666
ACN-0181343	questionable: monophenol monooxygenase activator				3.647
ACN-0183920	unknown				3.609
ACN-0186842	putative: potassium:amino acid symporter	amino acid metabolic process;cation transport;neurotransmitter transport;extracellular transport;amino acid transport	neurotransmitter:sodium symporter activity;cation transporter activity;potassium:amino acid symporter activity	integral to plasma membrane	3.601
ACN-0184442	putative: serine carboxyprotease	proteolysis;defense response;melanization defense response;positive regulation of melanization defense response	serine carboxypeptidase activity;trypsin activity;serine-type peptidase activity;monophenol monooxygenase activator activity		3.514
ACN-0180530	putative: cecropin	antibacterial humoral response (sensu Protostomia);defense response to bacterium;defense response to Gram-negative bacterium;defense response to Gram-positive bacterium;defense response to fungus		extracellular region	3.433
ACN-0180480	serine protease	proteolysis	serine-type endopeptidase activity		3.397
ACN-0186260	conserved unknown				3.261
ACN-0181029	unknown				3.224
ACN-0180264	questionable: acetyl-CoA carboxylase				3.211
ACN-0186097	putative: chitinase	cuticle chitin catabolic process;signal transduction;cell-cell signaling	chitinase activity;hydrolase activity, hydrolyzing N-glycosyl compounds	extracellular region	3.047
ACN-0183113	unknown				3.014
ACN-0185734	unknown				2.891
ACN-0181759	endonuclease G	DNA-dependent DNA replication;apoptotic program	nucleic acid binding;endodeoxyribonuclease activity	mitochondrion;mitochondrial inner membrane	2.817
ACN-0183865	unknown				2.796
ACN-0185451	chromosome segregation in cell cycle	cell cycle;chromosome segregation;mitotic checkpoint;mitotic spindle checkpoint		kinetochore;nucleus;nuclear envelope;cytoplasm;kinetochore microtubule	2.769
ACN-0185838	unknown				2.768
ACN-0186540	phosphomannomutase	monosaccharide metabolic process	phosphomannomutase activity		2.747
ACN-0182451	histone deacetylase	histone deacetylation	histone deacetylase activity	histone deacetylase complex	2.746
ACN-0180268	putative: conserved unknown				2.692
ACN-0188039	conserved unknown				2.603
ACN-0186585	unknown product				2.584
ACN-0181224	putative: mucin-like peritrophin				2.577
ACN-0186413	questionable: conserved unknown				2.527
ACN-0182842	putative: conserved unknown				2.517
ACN-0187256	peptidoglycan recognition protein LE	defense response;immune response;signal transduction;peptidoglycan catabolic process;response to bacterium;defense response to Gram-positive bacterium	receptor activity;protein binding;N-acetylmuramoyl-L-alanine amidase activity;peptidoglycan receptor activity;peptidoglycan binding	extracellular region;integral to plasma membrane	2.513
ACN-0184272	putative: RNA binding -!- RNA binding		nucleotide binding;mRNA binding		2.452
ACN-0185878	unknown				2.44
ACN-0181973	conserved unknown	defense response;defense response to bacterium	receptor binding		2.435
ACN-0185874	unknown				2.317
ACN-0187869	putative: conserved unknown	ciliary or flagellar motility;muscle contraction;calcium-mediated signaling	calcium ion binding;calmodulin binding	flagellin-based flagellum	2.278
ACN-0184588	questionable: conserved unknown				2.26
ACN-0180210	questionable: conserved unknown				2.237
ACN-0181327	ligand-dependent nuclear receptor	regulation of transcription from RNA polymerase II promoter;lipid metabolic process;signal transduction;border follicle cell migration (sensu Insecta);metamorphosis;neuron remodeling;ecdysone-mediated induction of salivary gland cell autophagic cell death;regulation of development, heterochronic;negative regulation of cell differentiation;negative regulation of transcription, DNA-dependent;positi…	DNA binding;transcription factor activity;ligand-dependent nuclear receptor activity;ecdysteroid hormone receptor activity;juvenile hormone binding;protein binding;zinc ion binding;sequence-specific DNA binding	nucleus;polytene chromosome;ecdysone receptor holocomplex;dendrite	2.236
ACN-0185938	putative: actin binding	cytoskeletal anchoring;signal transduction;ectoderm development;nervous system development	actin binding;receptor binding;structural constituent of cytoskeleton;cytoskeletal protein binding	plasma membrane	2.205
ACN-0181464	questionable: conserved unknown				2.106
ACN-0184161	unknown				2.079
ACN-0181839	unknown				2.079
ACN-0185154	unknown				2.078
ACN-0187517	DNA-directed RNA polymerase	transcription from RNA polymerase III promoter;tRNA metabolic process;rRNA metabolic process	nucleic acid binding;DNA binding;DNA-directed RNA polymerase activity	nucleus;DNA-directed RNA polymerase III complex	2.075
ACN-0186997	unknown				2.054
ACN-0184171	serine protease -!- serine protease	proteolysis	serine-type endopeptidase activity		2.053
ACN-0185411	unknown				2.04
ACN-0182272	wide-spectrum protease inhibitor	antibacterial humoral response (sensu Protostomia)	serine-type endopeptidase inhibitor activity;wide-spectrum protease inhibitor activity		2.019
ACN-0183258	cytochrome oxidase subunit 3				2.002
ACN-0187643	questionable: D-aspartate oxidase				-2.01
ACN-0185109	conserved unknown	amino acid transport;regulation of growth	amino acid-polyamine transporter activity;amino acid transporter activity	membrane	-2.02
ACN-0184166	3-oxoacid CoA-transferase	fatty acid metabolic process;ketone body catabolic process	3-oxoacid CoA-transferase activity	mitochondrial matrix	-2.03
ACN-0182985	protein transporter	SRP-dependent cotranslational protein targeting to membrane, translocation;cell death;protein secretion	protein transporter activity;protein translocase activity	translocon complex	-2.06
ACN-0184427	unknown				-2.08
ACN-0184581	3-hydroxyisobutyrate dehydrogenase	pentose-phosphate shunt;amino acid metabolic process;valine metabolic process	phosphogluconate dehydrogenase (decarboxylating) activity;3-hydroxyisobutyrate dehydrogenase activity;NAD binding	mitochondrion	-2.09
PAH					-2.09
ACN-0187875	methylenetetrahydrofolate dehydrogenase (NADP+)	amino acid biosynthetic process;folic acid and derivative biosynthetic process	formate-tetrahydrofolate ligase activity;methenyltetrahydrofolate cyclohydrolase activity;methylenetetrahydrofolate dehydrogenase (NADP+) activity;ATP binding		-2.1
ACN-0183287	Fructose-1,6-bisphosphatase	carbohydrate metabolic process	fructose-bisphosphatase activity		-2.15
ACN-0182106	unknown				-2.2
ACN-0187001	mitochondrial large ribosomal subunit L3	translation	nucleic acid binding;structural constituent of ribosome	mitochondrial large ribosomal subunit;mitochondrial small ribosomal subunit	-2.22
ACN-0180353	phosphoribosylformylglycinamidine cyclo-ligase	purine base metabolic process;'de novo' IMP biosynthetic process;purine base biosynthetic process	phosphoribosylamine-glycine ligase activity;phosphoribosylformylglycinamidine cyclo-ligase activity;phosphoribosylglycinamide formyltransferase activity;ATP binding;hydrolase activity	cytoplasm	-2.23
ACN-0184278	aldehyde dehydrogenase	pyruvate metabolic process;amino acid catabolic process	aldehyde dehydrogenase (NAD) activity	mitochondrion;mitochondrial matrix	-2.24
ACN-0182995	receptor signaling protein	intracellular protein transport	receptor signaling protein activity;calcium ion binding	endoplasmic reticulum	-2.24
ACN-0187479	dolichyl-phosphate beta-glucosyltransferase	carbohydrate metabolic process;protein amino acid glycosylation	dolichyl-phosphate beta-glucosyltransferase activity		-2.29
ACN-0183409	RNA-binding	carbohydrate metabolic process;biosynthetic process	mRNA binding;serine-type endopeptidase activity;receptor activity;lyase activity;strictosidine synthase activity	cell surface;membrane	-2.33
ACN-0184599	putative: protein transporter	SRP-dependent cotranslational protein targeting to membrane, translocation;cell death;protein secretion	protein transporter activity;protein translocase activity	translocon complex	-2.49
ACN-0187373	unknown				-2.51
ACN-0187235	putative: carboxy-lyase	amino acid metabolic process;amino acid catabolic process	carboxy-lyase activity;isomerase activity		-2.54
ACN-0181261	putative: oxidoreductase		oxidoreductase activity		-2.62
ACN-0184438	conserved unknown	RNA localization;intracellular protein transport;exocytosis;membrane budding;larval cuticle biosynthetic process (sensu Insecta);larval cuticle pattern formation (sensu Insecta)			-2.63
ACN-0185620	unknown				-2.65
ACN-0181536	putative: endoribonuclease	RNA catabolic process	nucleic acid binding;endoribonuclease activity;ribonuclease activity		-2.71
ACN-0184810	unknown				-2.75
ACN-0180243	4-hydroxyphenylpyruvate dioxygenase	amino acid catabolic process;aromatic amino acid family metabolic process	4-hydroxyphenylpyruvate dioxygenase activity		-3.1
ACN-0185441	unknown				-3.33
ACN-0183361	triacylglycerol lipase	lipid metabolic process	triacylglycerol lipase activity		-3.61
ACN-0181795	branched chain keto acid dehydrogenase E1, alpha polypeptide -!- 3-methyl-2-oxobutanoate dehydrogenase	amino acid catabolic process;acyl-CoA biosynthetic process	3-methyl-2-oxobutanoate dehydrogenase (2-methylpropanoyl-transferring) activity	3-methyl-2-oxobutanoate dehydrogenase (lipoamide) complex	-4.26
ACN-0186186	vitellogenin				-5.1
ACN-0183752	putative: sarcosine dehydrogenase	electron transport;amino acid metabolic process;glycine catabolic process	aminomethyltransferase activity;sarcosine dehydrogenase activity	cytoplasm	-6.21
ACN-0186915	G protein-coupled receptor kinase	protein amino acid phosphorylation;signal transduction	protein serine/threonine kinase activity;AMP-activated protein kinase activity;receptor signaling protein serine/threonine kinase activity;G-protein coupled receptor kinase activity;ATP binding	nucleus;AMP-activated protein kinase complex	-7.09
ACN-0180944	unknown				-7.87
ACN-0187872	putative: conserved unknown				-8.85
ACN-0180633	putative: conserved unknown				-12.14
ACN-0181169	unknown				-12.45
ACN-0180295	unknown				-17.15
ACN-0185390	questionable: kinase regulator				-46.73
ACN-0183679	unknown				-49.02
12 Hour
ACN-0185889	unknown				17.85
ACN-0185532	questionable: keratin				13.56
ACN-0187011	questionable: keratin 10				6.711
ACN-0184442	putative: serine carboxyprotease	proteolysis;defense response;melanization defense response;positive regulation of melanization defense response	serine carboxypeptidase activity;trypsin activity;serine-type peptidase activity;monophenol monooxygenase activator activity		6.173
ACN-0187239	putative: conserved unknown				5.065
ACN-0186510	questionable: conserved unknown				4.45
ACN-0186097	putative: chitinase	cuticle chitin catabolic process;signal transduction;cell-cell signaling	chitinase activity;hydrolase activity, hydrolyzing N-glycosyl compounds	extracellular region	4.162
ACN-0183115	microvilli membrane protein				4.081
ACN-0180264	questionable: acetyl-CoA carboxylase				3.959
ACN-0183253	putative: serine protease -!- questionable: Bombyx mori prophenoloxidase activating factor 3	proteolysis	serine-type endopeptidase activity		3.891
ACN-0185796	unknown				3.509
ACN-0184350	unknown product				3.412
ACN-0181325	serine protease	proteolysis	serine-type endopeptidase activity		3.207
ACN-0183920	unknown				3.148
ACN-0185612	serine protease				3.123
ACN-0183119	unknown				3.105
ACN-0186593	unknown				2.943
ACN-0186082	questionable: conserved unknown				2.939
ACN-0184428	conserved unknown				2.841
ACN-0185551	serine protease	proteolysis	serine-type endopeptidase activity		2.839
ACN-0183545	questionable: c-type lectin				2.823
ACN-0183808	unknown				2.718
ACN-0185874	unknown				2.674
ACN-0187198	unknown				2.646
ACN-0181965	unknown				2.626
ACN-0186385	putative: conserved unknown				2.585
ACN-0186540	phosphomannomutase	monosaccharide metabolic process	phosphomannomutase activity		2.527
ACN-0185734	unknown				2.505
ACN-0180814	conserved unknown				2.419
ACN-0185477	transferrin precursor -!- putative: transferrin	iron ion transport;iron ion homeostasis;defense response	iron ion transporter activity;carrier activity;ferric iron binding	extracellular region	2.281
ACN-0186610	questionable: conserved unknown				2.2
ACN-0186260	conserved unknown				2.19
ACN-0186612	oxidoreductase	metabolic process	oxidoreductase activity		2.173
ACN-0182727	farnesoic acid O methyltransferase		farnesoic acid O-methyltransferase activity		2.147
ACN-0185578	unknown				2.066
ACN-0182518	questionable: chitin binding				2.06
ACN-0182300	unknown				2.057
ACN-0184325	putative: serine protease	proteolysis;maternal determination of dorsal/ventral axis, oocyte, germ-line encoded;Toll signaling pathway;dorsal/ventral axis specification;protein processing	serine-type endopeptidase activity;trypsin activity;peptidase activity;serine-type peptidase activity	extracellular region	2.026
ACN-0182783	unknown				2.011
ACN-0181295	questionable: chitin binding				2.005
ACN-0184400	unknown				2.005
ACN-0182874	questionable: conserved unknown				-2.02
ACN-0187930	trehalose phosphatase	disaccharide metabolic process;trehalose biosynthetic process	trehalose-phosphatase activity		-2.03
ACN-0183942	unknown				-2.04
ACN-0185953	unknown				-2.05
ACN-0187338	putative: pigment cell dehydrogenase reductase	lipid metabolic process	alcohol dehydrogenase activity		-2.09
ACN-0183976	cathepsin	proteolysis;salivary gland cell autophagic cell death;autophagic cell death;regulation of catalytic activity	cathepsin B activity		-2.11
ACN-0181741	small ribonucleoprotein Sm D3	nuclear mRNA splicing, via spliceosome;central nervous system development;peripheral nervous system development;muscle development;neuron differentiation;lymph gland development (sensu Arthropoda)		nucleus;spliceosome;small nuclear ribonucleoprotein complex	-2.13
ACN-0181711	unknown				-2.21
ACN-0183944	questionable: conserved unknown				-2.21
ACN-0185679	putative: guanyl-nucleotide exchange factor	intracellular signaling cascade;ectoderm development;nervous system development	guanyl-nucleotide exchange factor activity;receptor binding;diacylglycerol binding		-2.22
ACN-0186622	juvenile hormone epoxide hydrolase	juvenile hormone catabolic process;defense response;response to toxin	epoxide hydrolase activity;juvenile hormone epoxide hydrolase activity	microsome;membrane	-2.23
ACN-0187069	dynamin associated	intracellular protein transport;receptor-mediated endocytosis;neurotransmitter secretion;protein localization;synaptic vesicle endocytosis;synaptic growth at neuromuscular junction	calcium ion binding;protein binding	presynaptic membrane	-2.24
ACN-0185437	questionable: N-glycosyl hydrolase				-2.25
ACN-0186509	unknown				-2.5
ACN-0186640	cysteine protease	proteolysis	cysteine-type endopeptidase activity		-2.58
ACN-0186227	questionable: conserved unknown				-2.7
ACN-0183192	unknown				-2.75
ACN-0185677	unknown				-2.78
ACN-0185386	conserved unknown				-3.25
ACN-0181396	unknown				-3.26
ACN-0187057	questionable: conserved unknown				-3.72
ACN-0180723	questionable: conserved unknown				-4.93
ACN-0183601	putative: cell proliferation component	cell proliferation			-5.38
ACN-0183717	unknown				-5.43
ACN-0183196	unknown				-5.92
ACN-0183632	histone-arginine N-methyltransferase	protein amino acid methylation;histone methylation;peptidyl-arginine methylation, to asymmetrical-dimethyl arginine;induction of programmed cell death by ecdysone	histone-arginine N-methyltransferase activity;protein-arginine N-methyltransferase activity;protein-arginine omega-N monomethyltransferase activity;protein-arginine omega-N asymmetric methyltransferase activity;histone methyltransferase activity	histone methyltransferase complex	-11.34
ACN-0186279	thioredoxin peroxidase	oxygen and reactive oxygen species metabolic process;apoptosis;induction of apoptosis;defense response	peroxidase activity;thioredoxin peroxidase activity;antioxidant activity	extracellular region	-11.45
ACN-0185708	putative: conserved unknown				-12.87
ACN-0183249	unknown				-14.95
ACN-0180722	unknown				-15.92
ACN-0182774	putative: ATP-dependent RNA helicase	nucleobase, nucleoside, nucleotide and nucleic acid metabolic process	mRNA binding;ATP-dependent RNA helicase activity;ATP binding		-22.17
ACN-0186359	conserved unknown -!- putative: protein phosphatase regulator	protein amino acid dephosphorylation	protein serine/threonine phosphatase activity;binding;protein phosphatase type 2A regulator activity	protein phosphatase type 2A complex;protein serine/threonine phosphatase complex	-29.24
ACN-0187872	putative: conserved unknown				-32.87
ACN-0183765	questionable: conserved unknown				-43.48
ACN-0180241	questionable: transcription regulator				-51.55
24 Hour
ACN-0185532	questionable: keratin				10.25
ACN-0185889	unknown				5.017
ACN-0180341	putative: cecropin A				4.608
ACN-0187011	questionable: keratin 10				3.916
ACN-0180530	putative: cecropin	antibacterial humoral response (sensu Protostomia);defense response to bacterium;defense response to Gram-negative bacterium;defense response to Gram-positive bacterium;defense response to fungus		extracellular region	3.664
ACN-0186510	questionable: conserved unknown				3.546
ACN-0183955	unknown				3.539
ACN-0186800	questionable: conserved unknown				3.176
ACN-0182054	lysozyme				3.133
ACN-0183044	questionable: conserved unknown				3.132
ACN-0183243	conserved unknown				3.08
ACN-0180447	unknown				2.911
ACN-0183908	glutamyl-tRNA(Gln) amidotransferase	glutaminyl-tRNA aminoacylation;amino acid metabolic process	glutamyl-tRNA(Gln) amidotransferase activity	mitochondrion	2.868
ACN-0183920	unknown				2.831
ACN-0186385	putative: conserved unknown				2.675
ACN-0186082	questionable: conserved unknown				2.674
ACN-0182914	questionable: holotricin 3				2.566
ACN-0181161	unknown				2.492
ACN-0180457	questionable: conserved unknown				2.477
ACN-0183253	putative: serine protease -!- questionable: Bombyx mori prophenoloxidase activating factor 3	proteolysis	serine-type endopeptidase activity		2.412
ACN-0184331	unknown				2.404
ACN-0184046	unknown				2.383
ACN-0185767	questionable: conserved unknown				2.371
ACN-0182300	unknown				2.348
ACN-0184455	ubiquinol-cytochrome-c reductase	mitochondrial electron transport, ubiquinol to cytochrome c	ubiquinol-cytochrome-c reductase activity;ubiquinone binding	mitochondrial respiratory chain complex III	2.345
ACN-0182523	unknown				2.312
ACN-0185612	serine protease				2.294
ACN-0182159	questionable: actin binding protein				2.276
ACN-0182376	questionable: transmembrane receptor protein serine/threonine kinase				2.269
ACN-0186274	unknown				2.243
ACN-0180850	defensin				2.237
ACN-0186389	questionable: conserved unknown				2.233
ACN-0186097	putative: chitinase	cuticle chitin catabolic process;signal transduction;cell-cell signaling	chitinase activity;hydrolase activity, hydrolyzing N-glycosyl compounds	extracellular region	2.199
ACN-0187345	questionable: conserved unknown				2.17
ACN-0184233	questionable: chitin binding protein				2.105
ACN-0180480	serine protease	proteolysis	serine-type endopeptidase activity		2.085
ACN-0186845	questionable: conserved unknown				2.066
ACN-0181002	gelsolin	cytoskeleton organization and biogenesis;phosphoenolpyruvate-dependent sugar phosphotransferase system	actin binding;structural constituent of cytoskeleton;sugar porter activity	extracellular region;cytosol;actin filament	2.057
ACN-0181325	serine protease	proteolysis	serine-type endopeptidase activity		2.056
ACN-0183531	questionable: conserved unknown				2.052
ACN-0185818	unknown				2.048
ACN-0185414	unknown product				2.026
ACN-0184720	putative: conserved unknown				-2.16
ACN-0187443	putative: development component	intracellular protein transport;multicellular organismal development			-2.21
ACN-0185269	cytosolic large ribosomal subunit L40	establishment and/or maintenance of chromatin architecture;regulation of transcription, DNA-dependent;translation;protein modification;ATP-dependent proteolysis;ubiquitin-dependent protein catabolic process;ubiquitin cycle;response to stress	nucleic acid binding;structural constituent of ribosome;protein binding	nucleus;cytoplasm;ribosome;cytosolic large ribosomal subunit (sensu Eukaryota)	-2.26
ACN-0183803	questionable: conserved unknown				-2.39
ACN-0185695	protein kinase	protein amino acid phosphorylation;fatty acid metabolic process;response to stress;defense response;intracellular signaling cascade;regulation of phosphate metabolic process;cholesterol homeostasis	protein serine/threonine kinase activity;AMP-activated protein kinase activity;receptor signaling protein serine/threonine kinase activity		-2.58
ACN-0184471	unknown				-3.04
ACN-0187090	unknown				-3.61
ACN-0182041	conserved unknown				-4.59
ACN-0180774	unknown				-10.68
ACN-0183791	unknown				-13.7
ACN-0185232	questionable: conserved unknown				-15.65
ACN-0185659	unknown				-43.86
2-3 Days
ACN-0182132	unknown				4.637
ACN-0183153	putative: conserved unknown				3.144
ACN-0185574	unknown				2.446
ACN-0186547	conserved unknown			mediator complex	2.039
ACN-0185602	putative: odorant-binding				-2.14
5-6 Days
ACN-0180301	questionable: sugar binding protein				2.754
ACN-0186293	questionable: protein phosphatase				2.376
ACN-0186541	heat shock cognate 70-3 (Hsc70-3)	protein folding;protein complex assembly;defense response;response to heat;sleep	ATP binding;ATPase activity	endoplasmic reticulum	36.1
8-9 Days
ACN-0180672	putative: zinc ion binding	protein monoubiquitination;apoptosis;anti-apoptosis;multicellular organismal development;spermatid nuclear differentiation;border follicle cell migration (sensu Insecta);sensory organ development;germ cell migration;protein ubiquitination during ubiquitin-dependent protein catabolic process;negative regulation of apoptosis;negative regulation of caspase activity;antennal morphogenesis	ubiquitin-protein ligase activity;protein binding;zinc ion binding		6.269
ACN-0186414	Proteasome 25kD subunit endopeptidase	ATP-dependent proteolysis;ubiquitin-dependent protein catabolic process	endopeptidase activity;threonine endopeptidase activity	proteasome complex (sensu Eukaryota);proteasome core complex (sensu Eukaryota)	3.641
ACN-0186289	questionable: tropomyosin				3.557
ACN-0185612	serine protease				3.461
ACN-0185534	unknown				3.265
ACN-0180854	questionable: conserved unknown				3.078
ACN-0186497	NADH dehydrogenase				2.975
ACN-0186544	unknown				2.881
ACN-0187293	translation initiation factor 2 gamma -!- histone methyltransferase	DNA methylation;establishment and/or maintenance of chromatin architecture;chromatin assembly or disassembly;chromatin silencing;chromatin silencing at telomere;translational initiation;oogenesis (sensu Insecta);gene silencing;histone modification;histone methylation;chromatin silencing at centromere;histone H3-K9 methylation	tRNA binding;chromatin binding;translation initiation factor activity;GTP binding;zinc ion binding;histone methyltransferase activity;histone lysine N-methyltransferase activity (H3-K9 specific)	chromosome, pericentric region;heterochromatin;nucleus;cytosol;eukaryotic translation initiation factor 2 complex	2.87
ACN-0186418	putative: conserved unknown				2.761
ACN-0186622	juvenile hormone epoxide hydrolase	juvenile hormone catabolic process;defense response;response to toxin	epoxide hydrolase activity;juvenile hormone epoxide hydrolase activity	microsome;membrane	2.508
ACN-0185364	fasciclin	signal transduction;ectoderm development;axonogenesis;cell-cell adhesion		plasma membrane	2.071
13-14 Days
ACN-0186599	unknown				-2.07
ACN-0180660	questionable: patched binding protein				-20.88
