# Supplementary material for: Mosquito Transcriptome Profiles and Filarial Worm Susceptibility in Armigeres subalbatus
Source: PLoS Negl Trop Dis. 2010 Apr 20;4(4):e666. doi: 10.1371/journal.pntd.0000666 (PMC2857672; doi:10.1371/journal.pntd.0000666)
Supplement: Table S3 — Analysis of all Armigeres subalbatus genes transcribed by either Brugia pahangi- or Brugia malayi-infected mosquitoes. A tabular representation of all transcripts showing detectable differences in abundance at all time points. The table lists the ASAPID number, associated product, GO designation, and relative transcript abundance expressed as the fold difference between mosquitoes infected with either parasite. All time points are represented. (0.06 MB XLS) [file pntd.0000666.s003.xls]

## Sheet: Sheet1
Table S3. Analysis of all genes transcribed by either B. pahangi- or B. malayi-infected mosquitoes
ASAPID	Product	GO biological process	GO molecular function	GO cellular component	Relative Transcript Abundance (Fold difference p<0.05)
1 Hour- B. pahangi
ACN-0186732	bicoid mRNA localization	embryonic development (sensu Insecta);spermatogenesis;nurse cell to oocyte transport (sensu Insecta);regulation of bicoid mRNA localization;bicoid mRNA localization;pole plasm oskar mRNA localization		cytoplasm	2.493
ACN-0182068	putative: proteolysis and peptidolysis protein	regulation of progression through cell cycle;proteolysis		nuclear ubiquitin ligase complex;SCF ubiquitin ligase complex	2.414
ACN-0187951	conserved unknown				2.402
ACN-0180653	putative: methyltransferase-like	biological_process	S-adenosylmethionine-dependent methyltransferase activity	cellular_component	2.334
ACN-0187318	translation initiation factor	translational initiation	nucleotide binding;mRNA binding;translation initiation factor activity	cytosol;eukaryotic translation initiation factor 3 complex	2.113
ACN-0186450	G-protein coupled receptor	G-protein coupled receptor protein signaling pathway;pole cell migration;germ cell development;germ cell migration;germ cell programmed cell death;sensory perception of taste;sensory perception of sweet taste	taste receptor activity	integral to membrane	2.097
ACN-0180325	unknown				2.071
ACN-0180977	putative: conserved unknown				2.063
ACN-0181822	unknown product				2.063
ACN-0181202	carboxylesterase	signal transduction;cell-cell signaling;mating;courtship behavior;sexual reproduction;ovulation;pheromone biosynthetic process;regulation of female receptivity, post-mating;regulation of oviposition;sperm competition;sperm storage	carboxylesterase activity;receptor binding		2.033
B. malayi
ACN-0181620	putative: conserved unknown				2.01
ACN-0187823	putative: conserved unknown				2.02
ACN-0187311	unknown				2.03
ACN-0184223	serine protease	proteolysis	serine-type endopeptidase activity		2.03
ACN-0185637	unknown				2.06
ACN-0187157	putative: conserved unknown				2.08
ACN-0184573	unknown				2.1
ACN-0185106	unknown				2.11
ACN-0183474	questionable: Toll-7				2.11
ACN-0184199	unknown				2.13
ACN-0183161	unknown				2.15
ACN-0183415	putative: conserved unknown				2.16
ACN-0185433	7S RNA binding, signal recognition particle protein 19	translation;protein complex assembly;protein targeting;SRP-dependent cotranslational protein targeting to membrane	mRNA binding;7S RNA binding	signal recognition particle, endoplasmic reticulum targeting	2.16
ACN-0184368	questionable: fatty acid amide hydrolase				2.19
ACN-0184628	putative: serine protease	proteolysis;maternal determination of dorsal/ventral axis, oocyte, germ-line encoded;Toll signaling pathway;dorsal/ventral axis specification;protein processing	serine-type endopeptidase activity;trypsin activity;peptidase activity;serine-type peptidase activity	extracellular region	2.2
ACN-0184557	putative: conserved unknown				2.23
ACN-0183690	unknown				2.23
ACN-0185288	unprocessed 18S ribosomal RNA				2.24
ACN-0187341	unknown				2.25
ACN-0185142	ubiquitin conjugating enzyme	ubiquitin cycle;protein metabolic process	ubiquitin conjugating enzyme activity;ubiquitin-protein ligase activity;ligase activity		2.27
ACN-0180453	questionable: conserved unknown				2.3
ACN-0186850	unknown				2.31
ACN-0180536	unknown				2.38
ACN-0186466	unknown				2.42
ACN-0185342	questionable: A-CD36 protein				2.44
ACN-0181713	unknown				2.46
ACN-0185080	putative: conserved unknown				2.49
ACN-0182906	oxidoreductase	metabolic process	sterol carrier activity;oxidoreductase activity, acting on the CH-OH group of donors, NAD or NADP as acceptor		2.51
ACN-0181880	questionable: conserved unknown				2.66
ACN-0187499	questionable: cyclin T				2.67
ACN-0187821	putative: conserved unknown				2.7
ACN-0182328	unknown				2.71
ACN-0184981	unknown				2.72
ACN-0183964	questionable: conserved unknown				2.74
ACN-0180265	unknown				2.75
ACN-0180290	questionable: serine-type endopeptidase				2.75
ACN-0188103	unknown				2.85
ACN-0183370	RNA polymerase II transcription mediator	regulation of transcription from RNA polymerase II promoter	RNA polymerase II transcription mediator activity	mediator complex	2.86
ACN-0184868	questionable: conserved unknown				2.88
ACN-0185555	unknown				2.89
ACN-0180506	unknown				2.94
ACN-0186563	putative: conserved unknown	biological_process	molecular_function	integral to membrane	2.99
ACN-0187749	transcription unit				3.13
ACN-0183491	putative: diptericin	antibacterial humoral response (sensu Protostomia)		extracellular region	3.16
ACN-0186633	unknown				3.27
ACN-0183182	putative: tRNA methyltransferase	tRNA modification;methionine metabolic process	tRNA methyltransferase activity;S-adenosylmethionine-dependent methyltransferase activity		3.32
ACN-0183930	unknown				3.32
ACN-0180207	putatative: microtubule binding	mitotic spindle elongation;regulation of progression through cell cycle;microtubule-based process;mitotic spindle organization and biogenesis;chromosome segregation;establishment of mitotic spindle localization;mitotic spindle assembly	receptor binding;microtubule binding	microtubule;microtubule associated complex	3.38
ACN-0185290	questionable: conserved unknown				3.44
ACN-0183772	unknown				3.65
ACN-0182884	putative: dopamine N acetyltransferase	catecholamine metabolic process;behavior;sleep;biogenic amine catabolic process;dopamine catabolic process;serotonin catabolic process;regulation of circadian sleep/wake cycle, sleep;octopamine catabolic process;pigmentation during development	aralkylamine N-acetyltransferase activity;arylamine N-acetyltransferase activity;N-acetyltransferase activity		3.69
ACN-0187386	unknown				3.79
ACN-0185926	putative: exoribonuclease	nucleobase, nucleoside, nucleotide and nucleic acid metabolic process	nucleic acid binding;nuclease activity;exoribonuclease activity	intracellular	3.89
ACN-0183434	unknown				3.92
ACN-0180927	unknown				4
ACN-0185494	unknown				4.08
ACN-0187849	unknown				4.27
ACN-0187620	unknown				5.05
ACN-0185292	unknown				5.08
ACN-0180268	putative: conserved unknown				6.71
ACN-0181212	unknown				9.43
ACN-0180578	questionable: conserved unknown				10
ACN-0181651	unknown				10.57
6 Hour- B. pahangi
ACN-0186343	cathepsin	proteolysis;salivary gland cell autophagic cell death;autophagic cell death;regulation of catalytic activity	cathepsin B activity		2.97
ACN-0185027	defensin				2.928
ACN-0183615	unknown				2.62
ACN-0181956	unknown				2.572
ACN-0182883	questionable: transcription regulator				2.512
ACN-0183643	unknown				2.426
ACN-0184171	serine protease -!- serine protease	proteolysis	serine-type endopeptidase activity		2.225
ACN-0183573	serine carboxyprotease	proteolysis	serine carboxypeptidase activity		2.175
ACN-0183298	questionable: purine-nucleoside phosphorylase				2.112
ACN-0187140	alpha-tubulin	intracellular protein transport;cell motility;cytoskeleton organization and biogenesis;microtubule-based movement;chromosome segregation;mitosis;mitotic spindle checkpoint	GTPase activity;structural constituent of cytoskeleton;GTP binding;tubulin binding	microtubule;tubulin complex	2.105
ACN-0186671	ligase	ubiquitin cycle;protein metabolic process	ubiquitin-protein ligase activity;ligase activity		2.079
ACN-0180375	unknown				2.063
ACN-0181310	methyltransferase	protein modification;apoptosis;anti-apoptosis;protein metabolic process	S-adenosylmethionine-dependent methyltransferase activity		2.048
ACN-0186343	putative: conserved unknown				2.031
B. malayi
ACN-0181145	unknown				2.07
ACN-0185142	ubiquitin conjugating enzyme	ubiquitin cycle;protein metabolic process	ubiquitin conjugating enzyme activity;ubiquitin-protein ligase activity;ligase activity		2.07
ACN-0183491	putative: diptericin	antibacterial humoral response (sensu Protostomia)		extracellular region	2.09
ACN-0183434	unknown				2.3
ACN-0180207	putatative: microtubule binding	mitotic spindle elongation;regulation of progression through cell cycle;microtubule-based process;mitotic spindle organization and biogenesis;chromosome segregation;establishment of mitotic spindle localization;mitotic spindle assembly	receptor binding;microtubule binding	microtubule;microtubule associated complex	2.3
ACN-0182960	unknown				2.34
ACN-0185290	questionable: conserved unknown				2.36
ACN-0180552	protein translocase	protein targeting to mitochondrion;protein transport;protein import into mitochondrial inner membrane	protein translocase activity	mitochondrial inner membrane presequence translocase complex;mitochondrial intermembrane space protein transporter complex	2.42
ACN-0185292	unknown				2.6
ACN-0183772	unknown				2.75
ACN-0187267	unknown				2.79
ACN-0183065	putative: conserved unknown				2.9
ACN-0181819	unknown				2.97
ACN-0187331	unknown				3.1
ACN-0184455	ubiquinol-cytochrome-c reductase	mitochondrial electron transport, ubiquinol to cytochrome c	ubiquinol-cytochrome-c reductase activity;ubiquinone binding	mitochondrial respiratory chain complex III	3.4
ACN-0185725	putative: calpain	proteolysis;protein autoprocessing	calpain activity;calcium ion binding;calmodulin binding	cytoplasm;membrane	3.61
ACN-0180670	conserved unknown				3.83
ACN-0187150	unknown				4.37
ACN-0180533	protein tyrosine phosphatase	protein amino acid dephosphorylation;epidermal growth factor receptor signaling pathway;intracellular signaling cascade;terminal region determination;ventral midline development;tracheal epithelial cell migration (sensu Insecta);primary tracheal branching (sensu Insecta);imaginal disc development;R7 cell fate commitment;mesoderm development;dorsal/ventral axis determination, follicular epithelium…	protein tyrosine phosphatase activity;non-membrane spanning protein tyrosine phosphatase activity;receptor signaling protein tyrosine phosphatase activity;protein binding	cytoplasm	6.49
ACN-0185985	scavenger receptor	apoptosis;defense response;cell adhesion;salivary gland cell autophagic cell death;macrophage activation;autophagic cell death	scavenger receptor activity	lysosome;plasma membrane;integral to plasma membrane	7.81
12 Hour- B. pahangi
ACN-0184184	unknown				2.572
ACN-0187751	cyclin	regulation of progression through cell cycle;G1/S transition of mitotic cell cycle;transcription initiation from RNA polymerase II promoter	nucleic acid binding;DNA-directed RNA polymerase activity;RNA polymerase II transcription mediator activity;cyclin-dependent protein kinase regulator activity;kinase activator activity	mediator complex;nuclear cyclin-dependent protein kinase holoenzyme complex	2.478
ACN-0181480	putative: 4-nitrophenylphosphatase	metabolic process	4-nitrophenylphosphatase activity		2.325
ACN-0185865	trypsin	protein folding;proteolysis	trypsin activity;ATP binding;peptidase activity;serine-type peptidase activity;unfolded protein binding		2.268
ACN-0183942	unknown				2.225
ACN-0184007	putative: conserved unknown				2.18
ACN-0181760	receptor for activated protein kinase C (RACK)	protein targeting;signal transduction	protein kinase C binding		2.165
ACN-0184956	conserved unknown				2.16
ACN-0186418	putative: conserved unknown				2.109
ACN-0180865	large ribosomal subunit L6	translation	nucleic acid binding;structural constituent of ribosome	cytosolic large ribosomal subunit (sensu Eukaryota)	2.058
ACN-0181959	questionable: conserved unknown				2.042
ACN-0184171	serine protease -!- serine protease	proteolysis	serine-type endopeptidase activity		2.03
ACN-0183205	unknown				2.022
ACN-0184166	3-oxoacid CoA-transferase	fatty acid metabolic process;ketone body catabolic process	3-oxoacid CoA-transferase activity	mitochondrial matrix	2.006
ACN-0186682	putative: conserved unknown				2
B. malayi
ACN-0186832	unknown				2.01
ACN-0182306	unknown				2.02
ACN-0182376	questionable: transmembrane receptor protein serine/threonine kinase				2.06
ACN-0185505	putative: structural constituent of cuticle		structural constituent of cuticle (sensu Insecta)		2.08
ACN-0187093	unknown				2.09
ACN-0184195	glutathione transferase	oxygen and reactive oxygen species metabolic process;defense response;response to toxin	glutathione transferase activity	cytoplasm	2.1
ACN-0186842	putative: potassium:amino acid symporter	amino acid metabolic process;cation transport;neurotransmitter transport;extracellular transport;amino acid transport	neurotransmitter:sodium symporter activity;cation transporter activity;potassium:amino acid symporter activity	integral to plasma membrane	2.1
ACN-0186397	unknown				2.12
ACN-0184804	questionable: conserved unknown				2.13
ACN-0184205	unknown				2.14
ACN-0183339	unknown				2.16
ACN-0181460	putative: conserved unknown				2.16
ACN-0184359	unknown				2.17
ACN-0185018	unknown				2.18
ACN-0180257	questionable: conserved unknown				2.19
ACN-0186455	questionable: conserved unknown				2.19
ACN-0180763	unknown				2.2
ACN-0181965	unknown				2.2
ACN-0186426	putative: conserved unknown				7.81
24 Hour- B. pahangi
ACN-0186343	cathepsin	proteolysis;salivary gland cell autophagic cell death;autophagic cell death;regulation of catalytic activity	cathepsin B activity		5.8
ACN-0185301	putative: carboxypeptidase	proteolysis	carboxypeptidase A activity		3.363
ACN-0186840	unknown				3.092
ACN-0185489	unknown				3.043
ACN-0180707	putative: serine protease	proteolysis	serine-type endopeptidase activity;serine-type peptidase activity		2.836
ACN-0181840	conserved unknown	amino acid metabolic process;amino acid catabolic process	carboxy-lyase activity;isomerase activity		2.687
ACN-0184526	putative: conserved unknown				2.622
ACN-0183942	unknown				2.618
ACN-0184639	questionable: conserved unknown				2.551
ACN-0183573	serine carboxyprotease	proteolysis	serine carboxypeptidase activity		2.427
ACN-0186464	questionable: conserved unknown				2.406
ACN-0184952	unknown				2.261
ACN-0182042	questionable: conserved unknown				2.242
ACN-0181843	unknown				2.237
ACN-0185909	putative: conserved unknown				2.215
ACN-0184898	serine protease	regulation of transcription, DNA-dependent;proteolysis;defense response;maternal determination of dorsal/ventral axis, oocyte, germ-line encoded;Toll signaling pathway;dorsal/ventral axis specification	DNA binding;transcription factor activity;serine-type endopeptidase activity;trypsin activity;peptidase activity;serine-type peptidase activity;monophenol monooxygenase activator activity	extracellular region;nucleus	2.215
ACN-0180243	4-hydroxyphenylpyruvate dioxygenase	amino acid catabolic process;aromatic amino acid family metabolic process	4-hydroxyphenylpyruvate dioxygenase activity		2.178
ACN-0187814	questionable: conserved unknown				2.156
ACN-0187992	calreticulin -!- calreticulin	protein folding;intracellular protein transport;exocytosis;central nervous system development;peripheral nervous system development;olfactory behavior	calcium ion binding;unfolded protein binding	endoplasmic reticulum lumen	2.131
ACN-0187235	putative: carboxy-lyase	amino acid metabolic process;amino acid catabolic process	carboxy-lyase activity;isomerase activity		2.107
ACN-0186510	questionable: conserved unknown				2.087
ACN-0184369	Aedes aegypti putative protein G12				2.073
ACN-0185986	carboxypeptidase A				2.064
ACN-0187454	unknown				2.055
ACN-0186950	questionable: conserved unknown				2.038
ACN-0184826	putative: conserved unknown				2.032
ACN-0184687	questionable: conserved unknown				2.025
B. malayi
ACN-0182274	Apg12-like (autophagy-related protein)				2
ACN-0182548	questionable: conserved unknown				2.01
ACN-0186828	unknown				2.03
ACN-0186036	questionable: conserved unknown				2.06
ACN-0185176	conserved unknown -!- putative: conserved unknown				2.07
ACN-0186301	unknown				2.07
ACN-0183591	unknown				2.08
ACN-0181720	protein serine/threonine kinase	cytokinesis;electron transport;protein amino acid phosphorylation;chromosome segregation;mitosis;mesoderm development;heart development;photosynthesis	protein serine/threonine kinase activity;calcium- and calmodulin-dependent protein kinase activity;myosin light chain kinase activity;vascular endothelial growth factor receptor activity;structural constituent of cytoskeleton;ATP binding;centromeric DNA binding	phycobilisome	2.08
ACN-0184499	unknown				2.11
ACN-0186419	putative: cystatin		cysteine protease inhibitor activity		2.12
ACN-0182829	unknown				2.12
ACN-0187380	putative: conserved unknown				2.15
ACN-0183814	unknown				2.15
ACN-0184203	infection responsive short peptide (gambicin)				2.16
ACN-0183863	unknown				2.18
ACN-0181343	questionable: monophenol monooxygenase activator				2.18
ACN-0182511	unknown				2.2
ACN-0183531	questionable: conserved unknown				2.2
ACN-0181403	unknown				2.22
ACN-0187011	questionable: keratin 10				2.22
ACN-0186610	questionable: conserved unknown				2.23
ACN-0186082	questionable: conserved unknown				2.26
ACN-0185269	cytosolic large ribosomal subunit L40	establishment and/or maintenance of chromatin architecture;regulation of transcription, DNA-dependent;translation;protein modification;ATP-dependent proteolysis;ubiquitin-dependent protein catabolic process;ubiquitin cycle;response to stress	nucleic acid binding;structural constituent of ribosome;protein binding	nucleus;cytoplasm;ribosome;cytosolic large ribosomal subunit (sensu Eukaryota)	2.26
ACN-0180550	putative:serine protease				2.28
ACN-0187116	questionable: transcription regulator				2.28
ACN-0186182	putative: c-type lectin		sugar binding		2.29
ACN-0185551	serine protease	proteolysis	serine-type endopeptidase activity		2.29
ACN-0183842	unknown				2.34
ACN-0185617	unknown				2.34
ACN-0187727	questionable: mannose-binding lectin associated serine protease				2.35
ACN-0182059	questionable: conserved unknown				2.36
ACN-0181460	putative: conserved unknown				2.38
ACN-0181965	unknown				2.38
ACN-0181224	putative: mucin-like peritrophin				2.39
ACN-0183310	questionable: RNA polymerase II transcription factor				2.42
ACN-0182684	questionable: conserved unknown				2.42
ACN-0180457	questionable: conserved unknown				2.43
ACN-0185191	defensin -!- defensin	antibacterial humoral response (sensu Protostomia);positive regulation of biosynthetic process of antibacterial peptides active against anti-Gram-positive bacteria;defense response to bacterium;defense response to Gram-positive bacterium			2.47
ACN-0180739	questionable: conserved unknown				2.48
ACN-0186597	questionable: conserved unknown				2.49
ACN-0181148	questionable: matrix metalloproteinase				2.56
ACN-0183382	putative: conserved unknown				2.57
ACN-0185532	questionable: keratin				2.6
ACN-0185171	questionable: conserved unknown				2.66
ACN-0186784	questionable: conserved unknown				2.67
ACN-0185796	unknown				2.67
ACN-0182686	putative: 5-formyltetrahydrofolate cyclo-ligase	negative regulation of nucleoside metabolic process	enzyme inhibitor activity;5-formyltetrahydrofolate cyclo-ligase activity	mitochondrion	2.67
ACN-0186385	putative: conserved unknown				2.7
ACN-0182011	unknown				2.74
ACN-0181325	serine protease	proteolysis	serine-type endopeptidase activity		2.75
ACN-0185198	unknown				2.76
ACN-0182305	unknown				2.83
ACN-0186951	questionable: selenium binding protein				2.87
ACN-0184785	questionable: conserved unknown				2.87
ACN-0187653	questionable: serine protease inhibitor				2.91
ACN-0185531	questionable: conserved unknown				2.93
ACN-0187215	guanyl-nucleotide exchange factor	intracellular protein transport;small GTPase mediated signal transduction;vesicle-mediated transport	guanyl-nucleotide exchange factor activity;zinc ion binding	cellular_component	2.95
ACN-0183253	putative: serine protease -!- questionable: Bombyx mori prophenoloxidase activating factor 3	proteolysis	serine-type endopeptidase activity		2.95
ACN-0183731	conserved unknown			mediator complex	2.98
ACN-0182914	questionable: holotricin 3				2.98
ACN-0185767	questionable: conserved unknown				2.99
ACN-0187742	unknown				3.03
ACN-0186389	questionable: conserved unknown				3.07
ACN-0186435	dimethylaniline monooxygenase (N-oxide-forming)	electron transport;amino acid metabolic process	monooxygenase activity;dimethylaniline monooxygenase (N-oxide-forming) activity;disulfide oxidoreductase activity	mitochondrion;microsome;cytosol	3.08
ACN-0185889	unknown				3.11
ACN-0185734	unknown				3.17
ACN-0181669	unknown				3.24
ACN-0187356	unknown				3.33
ACN-0185304	serine protease				3.42
ACN-0184338	unknown				3.53
ACN-0186842	putative: potassium:amino acid symporter	amino acid metabolic process;cation transport;neurotransmitter transport;extracellular transport;amino acid transport	neurotransmitter:sodium symporter activity;cation transporter activity;potassium:amino acid symporter activity	integral to plasma membrane	3.76
ACN-0187579	questionable: conserved unknown				3.89
ACN-0184442	putative: serine carboxyprotease	proteolysis;defense response;melanization defense response;positive regulation of melanization defense response	serine carboxypeptidase activity;trypsin activity;serine-type peptidase activity;monophenol monooxygenase activator activity		3.95
ACN-0181500	unknown				4.18
ACN-0181848	unknown				4.76
ACN-0181041	putative: glycine-rich secreted salivary protein				4.88
ACN-0184399	cecropin -!- putative: cecropin	antibacterial humoral response (sensu Protostomia);salivary gland cell autophagic cell death;defense response to bacterium;autophagic cell death;defense response to Gram-negative bacterium;defense response to Gram-positive bacterium;defense response to fungus		extracellular region	4.93
ACN-0185434	unknown				4.93
ACN-0187404	unknown				5.59
ACN-0186800	questionable: conserved unknown				6.25
ACN-0185066	unknown				7.46
ACN-0180223	questionable: keratin				10.51
2-3 Day- B. pahangi
ACN-0185613	putative: pyrroline-5-carboxylate reductase	electron transport;proline biosynthetic process	pyrroline-5-carboxylate reductase activity		3.024
ACN-0188079	unknown				2.142
ACN-0180657	questionable: serine protease 6				2.109
ACN-0182492	questionable: NADH dehydrogenase subunit 4L				2.073
B. malayi
ACN-0187741	unknown				2.28
ACN-0185899	questionable: serine protease inhibitor				2.3
ACN-0182523	unknown				2.3
ACN-0180492	unknown				2.7
ACN-0184283	questionable: conserved unknown				2.87
ACN-0181159	unknown				2.91
